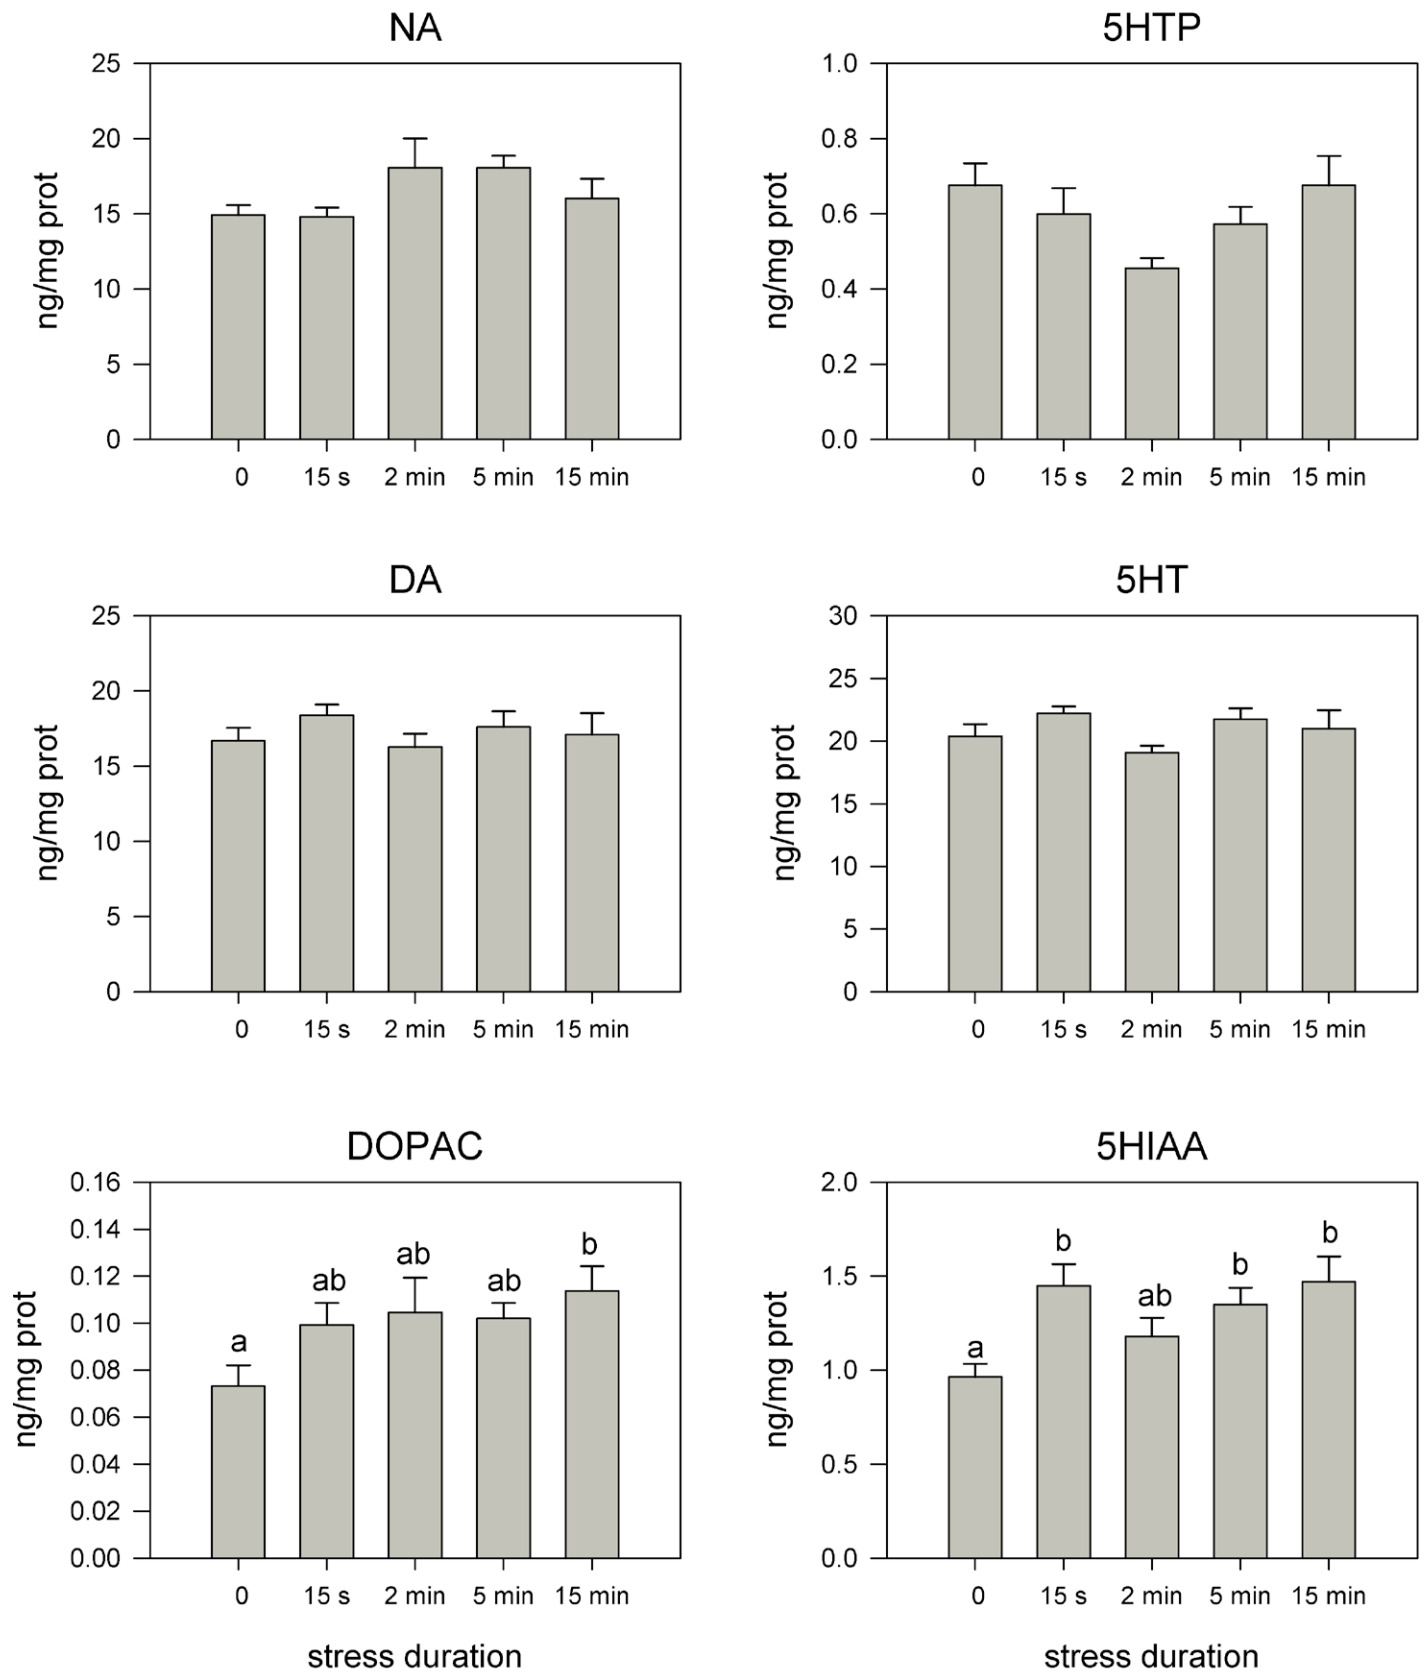

**Fig. S1.** Changes in the hypothalamic levels of NA, DA, DOPAC, 5HTP, 5HT and 5HIAA in rainbow trout exposed to acute handling stress for 15 s, 2 min, 5 min or 15 min and killed immediately afterwards. Values are means  $\pm$  s.e.m. ( $N=10$ ). Different letters indicate statistically significant differences among groups.

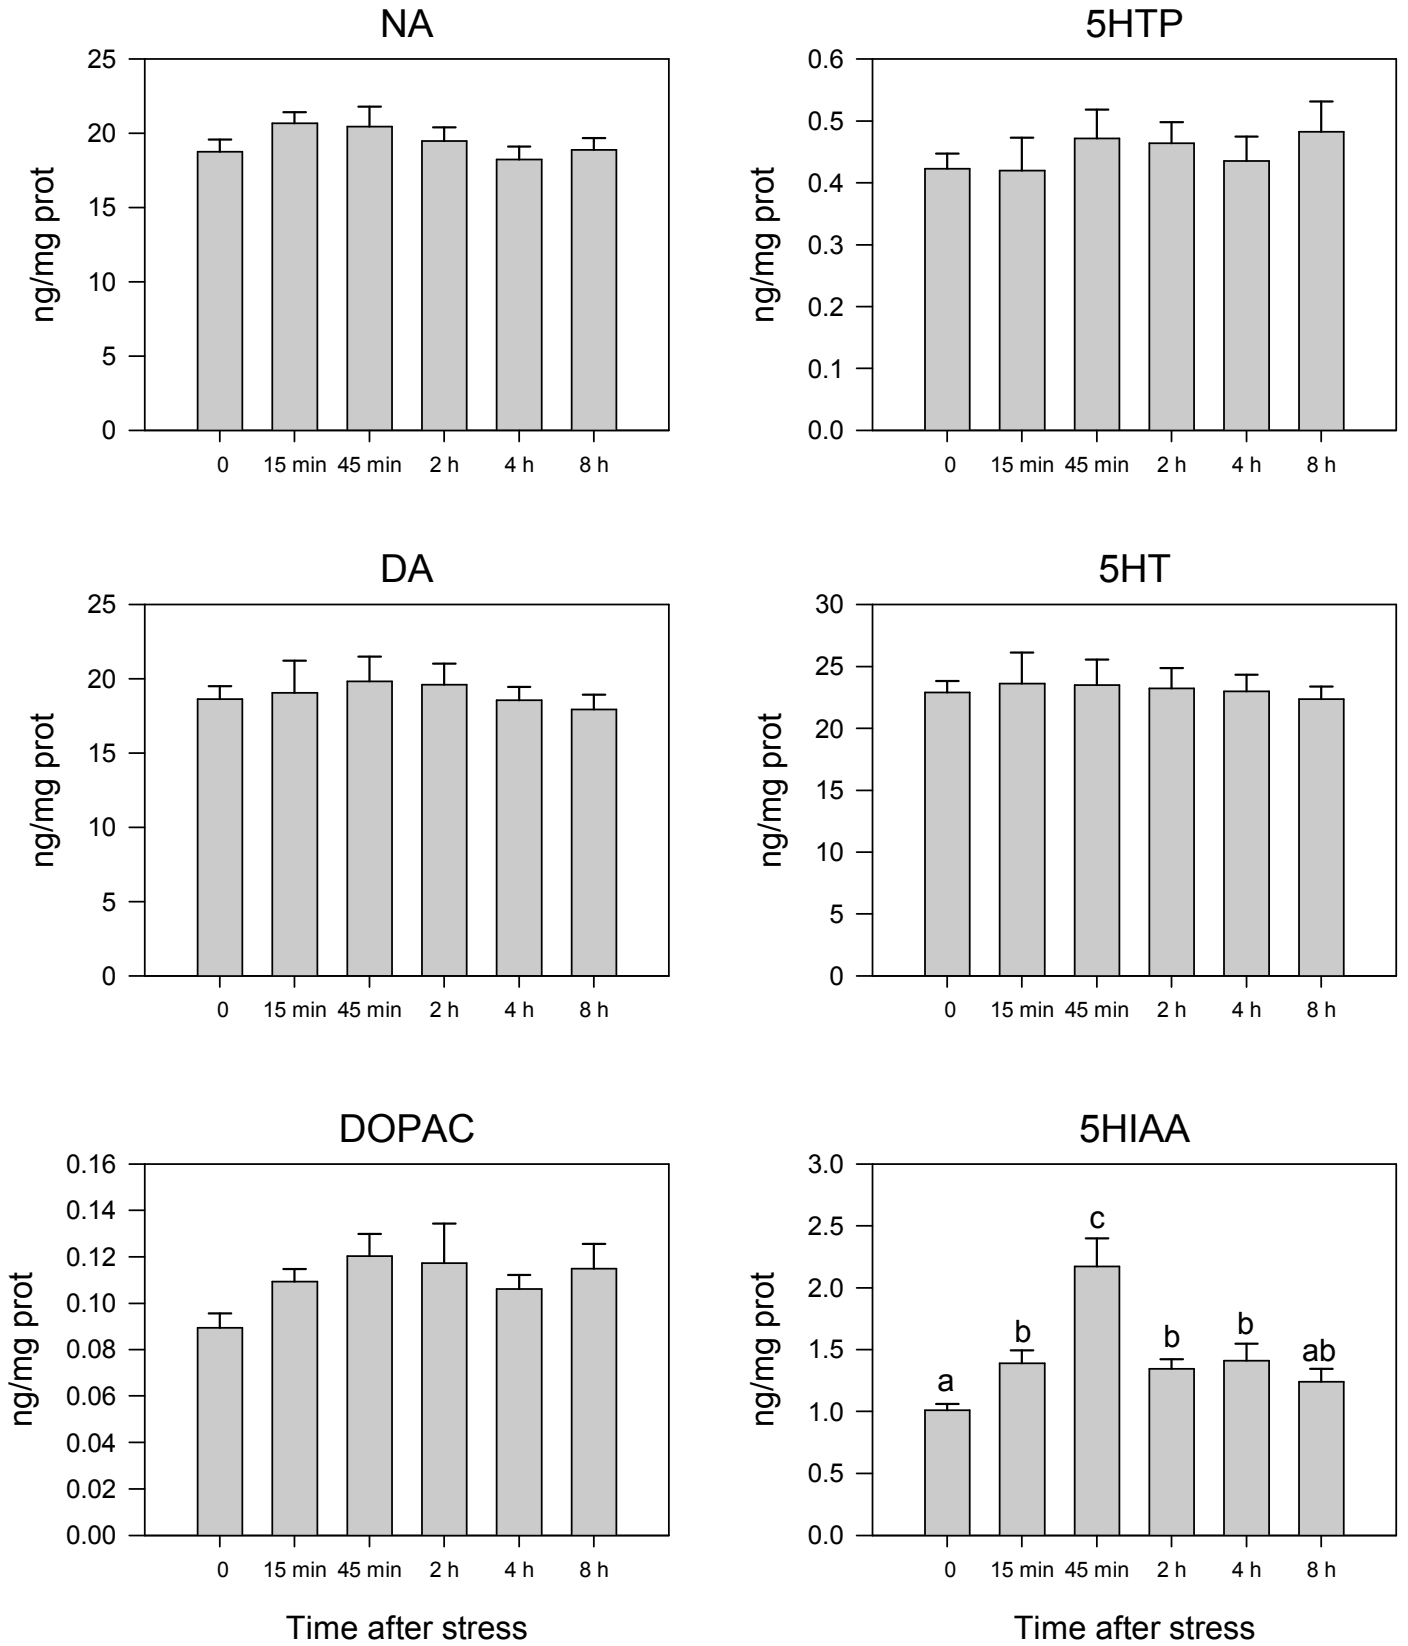

**Fig. S2.** Changes in the hypothalamic levels of NA, DA, DOPAC, 5HTP, 5HT and 5HIAA in rainbow trout exposed to 5 min of handling stress and killed 15 min, 45 min, 2 h, 4 h or 8 h later. Values are means  $\pm$  s.e.m. ( $N=10$ ). Different letters indicate statistically significant differences among groups.

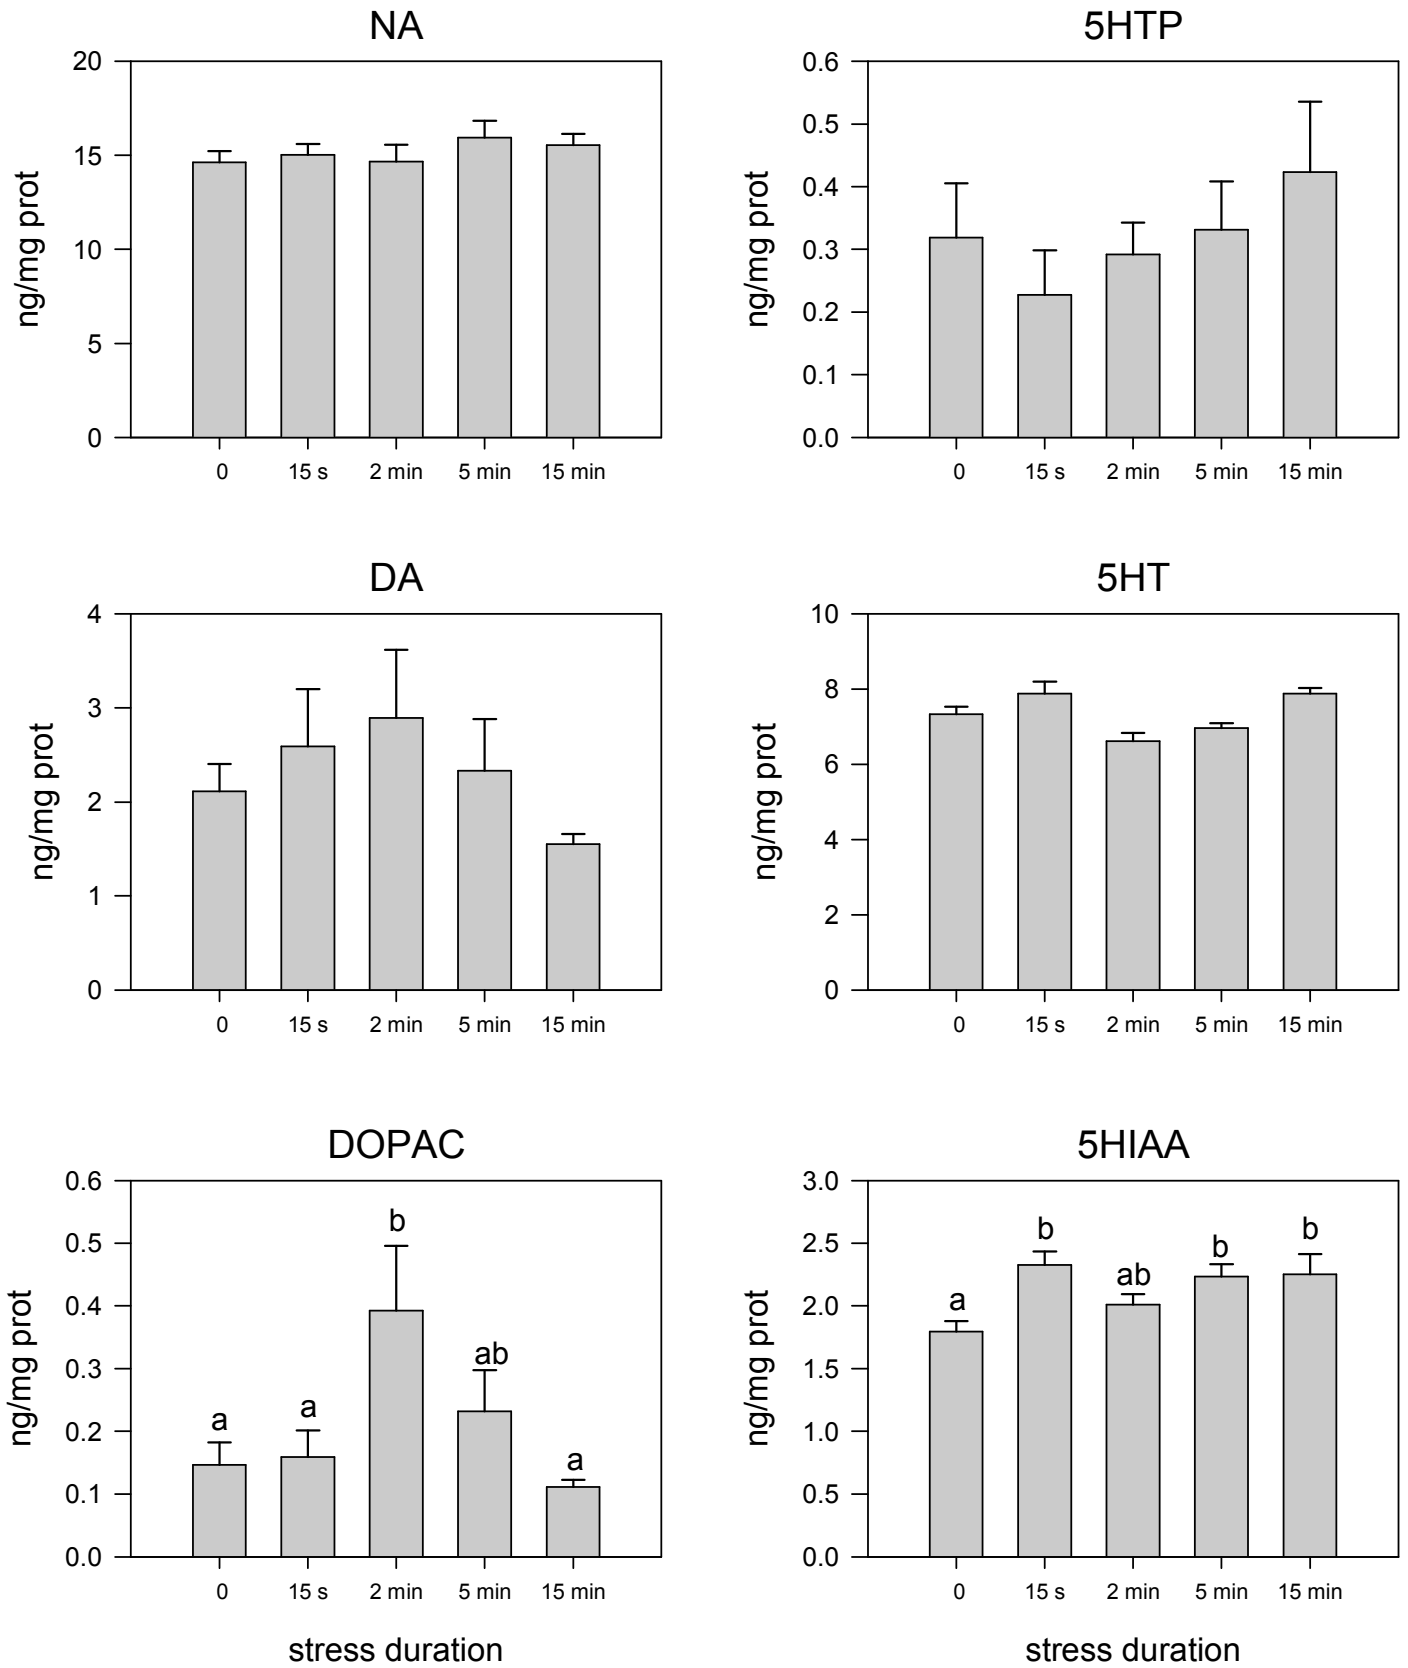

**Fig. S3.** Changes in the telencephalic levels of NA, DA, DOPAC, 5HTP, 5HT and 5HIAA in rainbow trout exposed to acute handling stress for 15 s, 2 min, 5 min or 15 min and killed immediately afterwards. Values are means  $\pm$  s.e.m. ( $N=10$ ). Different letters indicate statistically significant differences among groups.

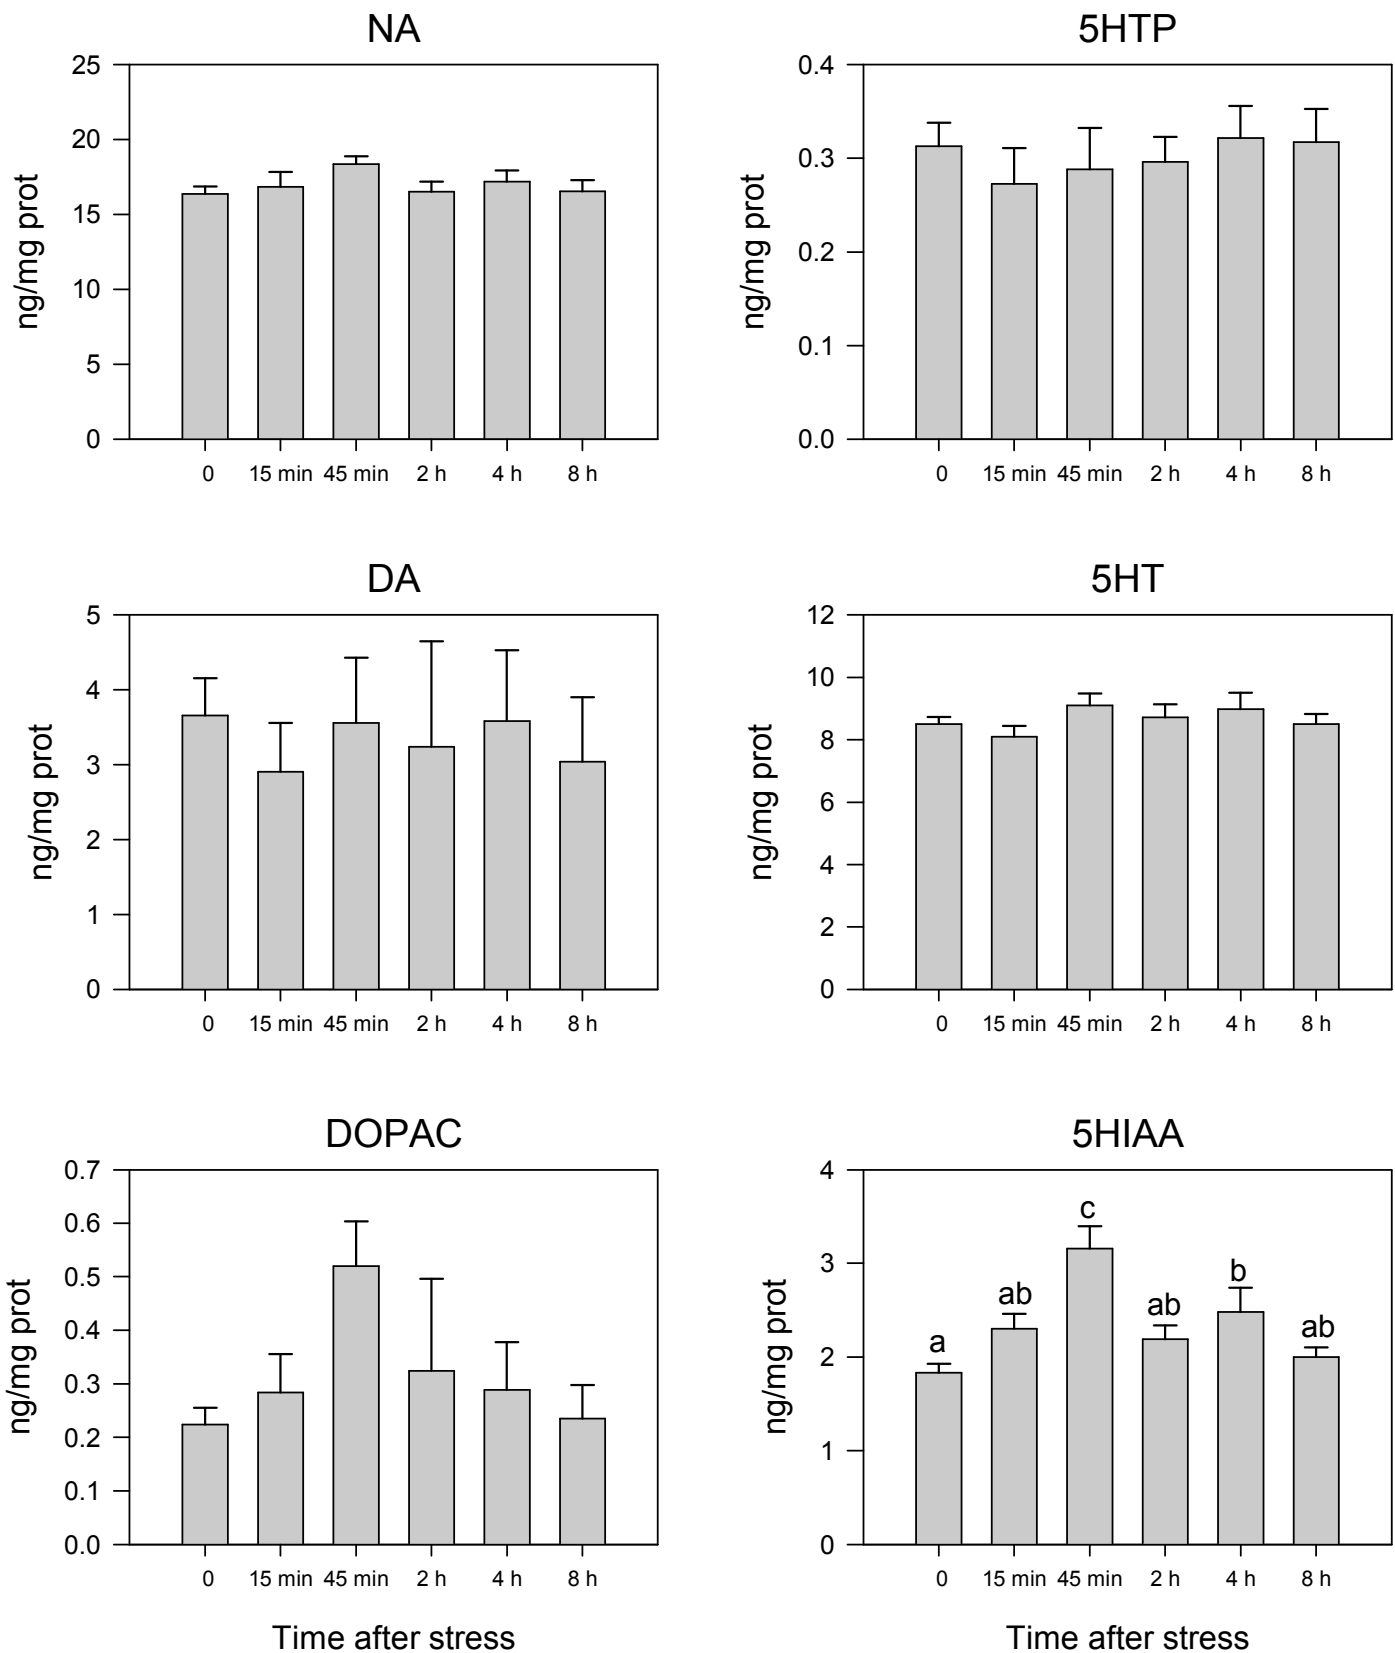

**Fig. S4.** Changes in the telencephalic levels of NA, DA, DOPAC, 5HTP, 5HT and 5HIAA in rainbow trout exposed to 5 min of handling stress and killed 15 min, 45 min, 2 h, 4 h or 8 h later. Values are means  $\pm$  s.e.m. ( $N=10$ ). Different letters indicate statistically significant differences among groups.
